# Supplementary material
Source: PubMed Central journal article supplement (PMC3541659)
Supplement: cr2012179x1.pdf [file cr2012179x1.pdf]

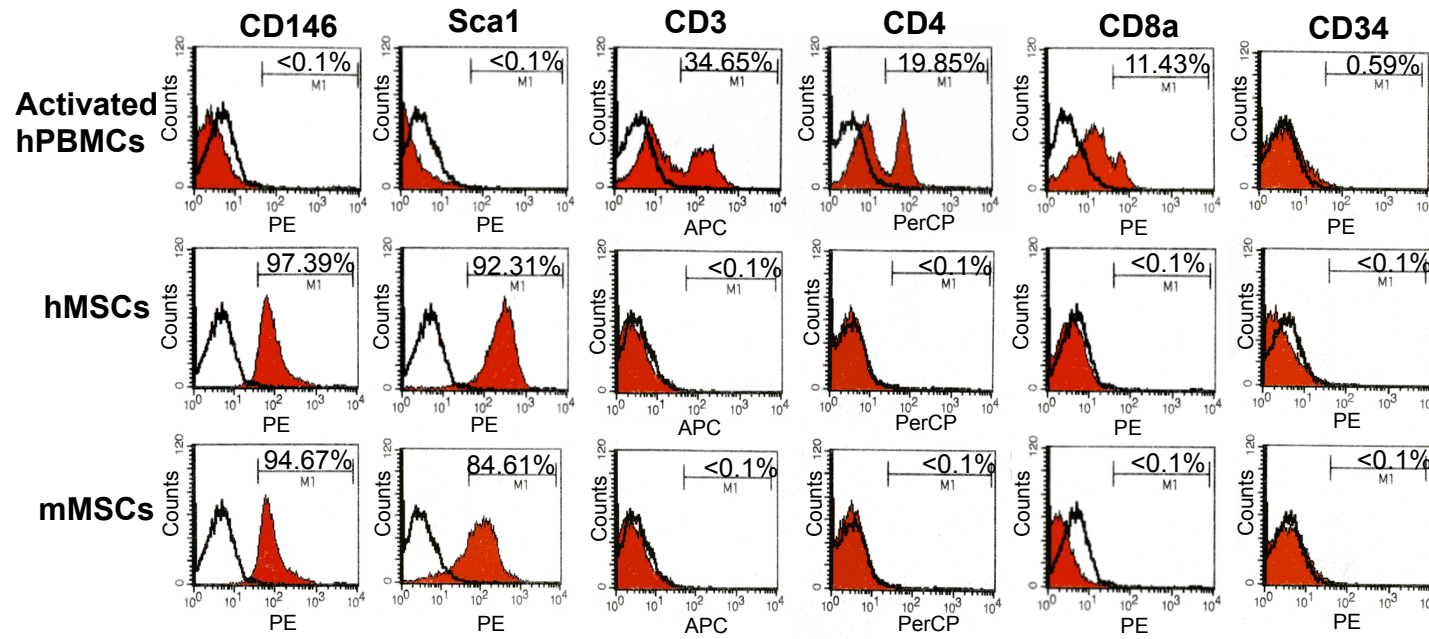

**Figure S1.** Flow cytometric analysis showed that hMSCs and mMSCs expressed stem cell markers CD146 and Sca1, but not hematopoietic markers CD34, CD3, CD4 and CD8a. Activated hPBMCs were used as positive control and isotopic IgGs were used as a negative control. The data are representative of three independent experiments.
