# Supplementary material
Source: PubMed Central journal article supplement (PMC3541659)
Supplement: cr2012179x2.pdf [file cr2012179x2.pdf]

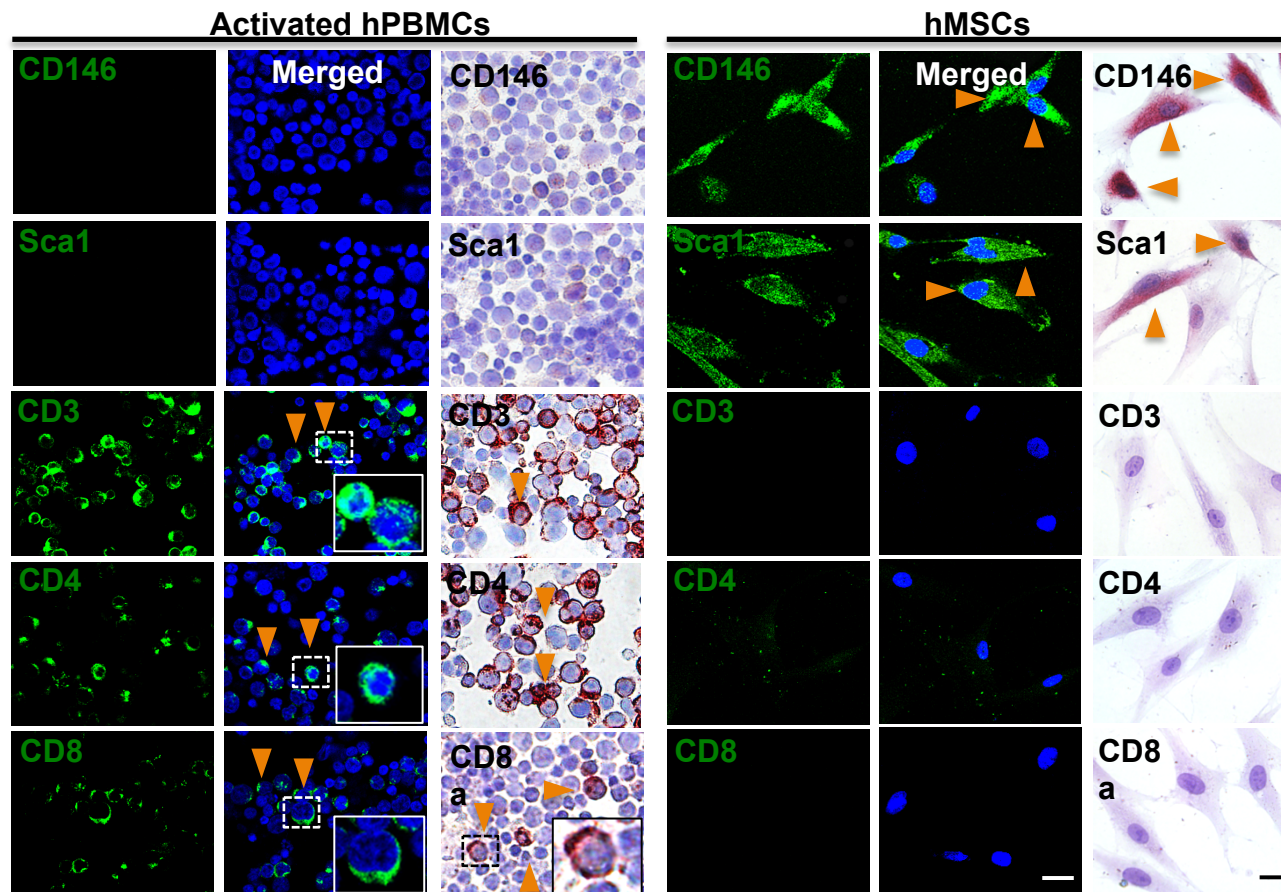

**Figure S2.** Immunofluorescent and immunocytochemical staining showed that hMSCs were positive for stem cell markers CD146 and Sca1, but negative for T cell markers CD3, CD4 and CD8a. Positive staining was indicated by orange triangles. Activated hPBMCs were used as control. Scale bar: 25  $\mu$ m. The data are representative of three independent experiments.
