# Supplementary material
Source: PubMed Central journal article supplement (PMC3541659)
Supplement: cr2012179x3.pdf [file cr2012179x3.pdf]

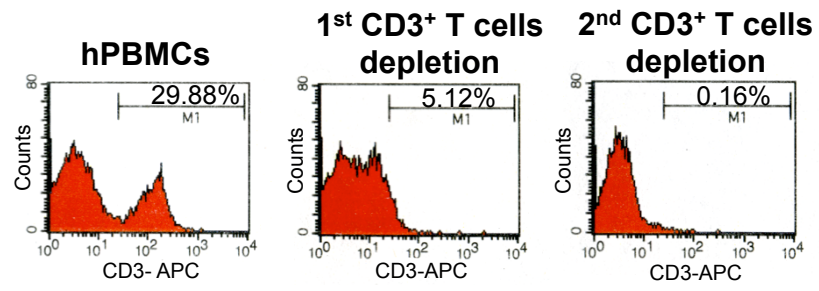

**Figure S3.** Flow cytometric analysis showed the efficacy of CD3 antibody/complement-mediated depletion of CD3<sup>+</sup> T cells in hPBMCs. The data are representative of three independent experiments.
