# Supplementary material
Source: PubMed Central journal article supplement (PMC3541659)
Supplement: cr2012179x4.pdf [file cr2012179x4.pdf]

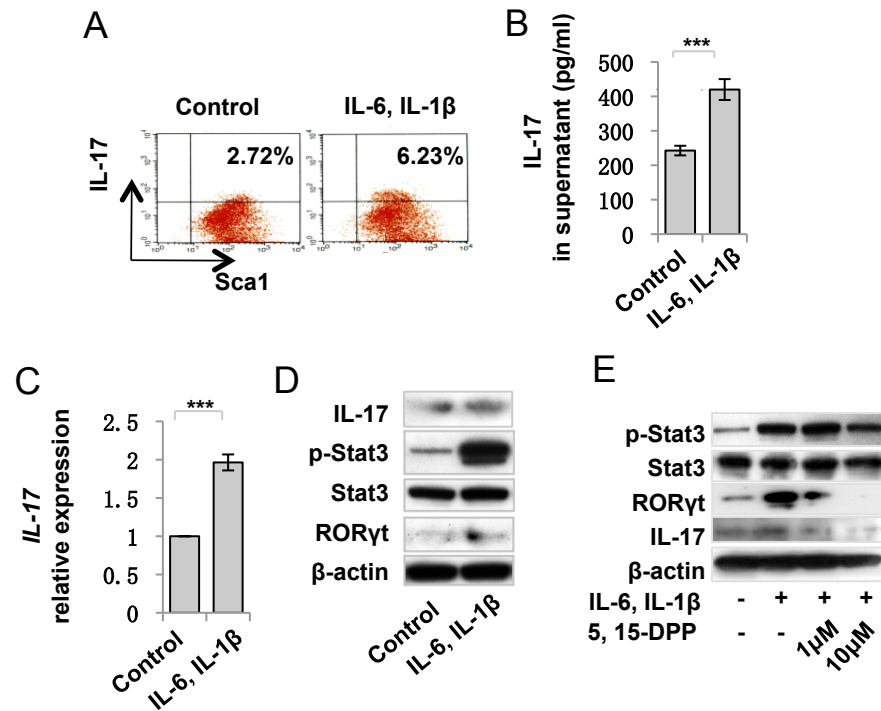

**Figure S4.** IL-17 expression was regulated by IL-1 $\beta$  and IL-6 *via* activating Stat3 and ROR $\gamma$ t. **(A)** Combinatorial treatment of IL-1 $\beta$  (20 ng/ml) and IL-6 (50 ng/ml) elevated IL-17<sup>+</sup> cell ratio in culture expanded hMSCs, as assessed by flow cytometry. **(B, C)** The combinatorial IL-1 $\beta$  and IL-6 treatment increased IL-17 level in 5 $\times$  concentrated culture supernatant, assessed by ELISA **(B)** and elevated IL-17 mRNA, assessed by qPCR **(C)**. **(D)** IL-1 $\beta$  and IL-6 treatment activated IL-17, p-Stat3 and ROR $\gamma$ t in hMSCs by Western blot analysis. **(E)** When hMSCs were pretreated with 5,15-DPP, a selective Stat3 inhibitor, for 2h, elevated expression of IL-17 and ROR $\gamma$ t induced by combinatorial IL-1 $\beta$  and IL-6 treatment was blocked when 5,15-DPP concentration reached 10  $\mu$ M, as assessed by Western blot analysis. \*,  $P < 0.05$ , \*\*,  $P < 0.01$ , and \*\*\*,  $P < 0.001$  (mean $\pm$ SD). The data are representative of three independent experiments.
