# Supplementary material
Source: PubMed Central journal article supplement (PMC3541659)
Supplement: cr2012179x5.pdf [file cr2012179x5.pdf]

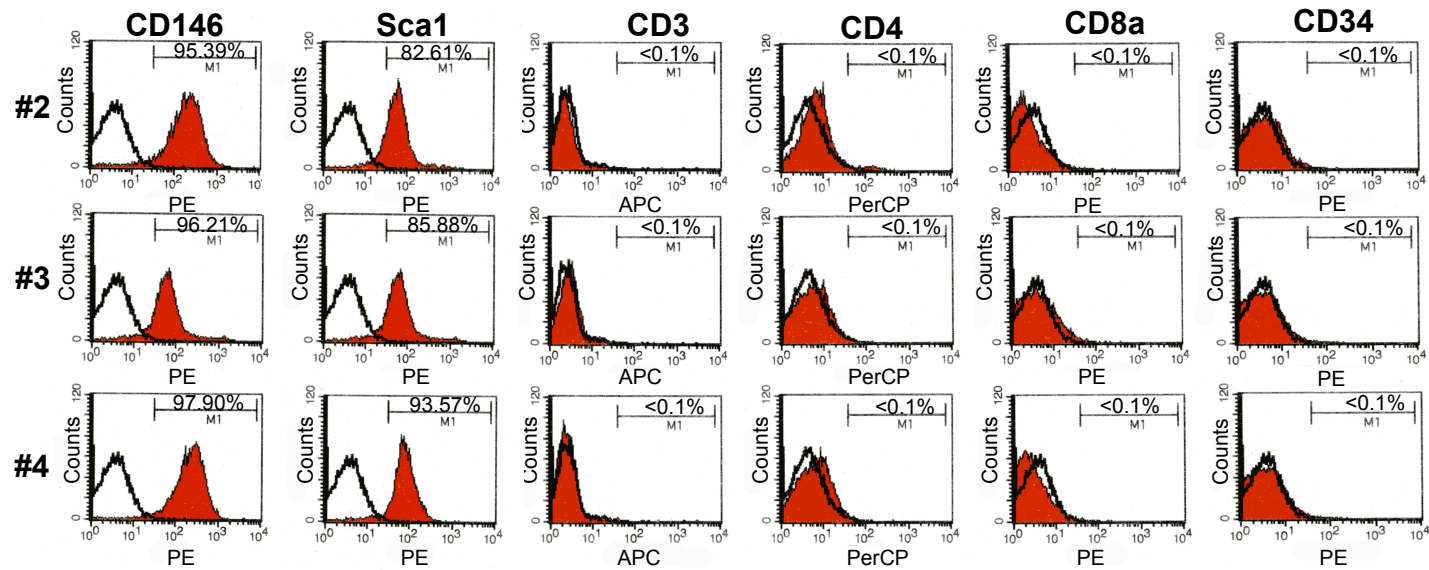

**Figure S5.** Flow cytometric analysis showed that IL-17<sup>+</sup> MSCs (#2, #3, and #4) expressed stem cell markers CD146 and Sca1, but not hematopoietic markers CD34, CD3, CD4 and CD8a. Isotopic IgGs were used as negative control. The data are representative of three independent experiments.
