# Supplementary material
Source: PubMed Central journal article supplement (PMC3541659)
Supplement: cr2012179x6.pdf [file cr2012179x6.pdf]

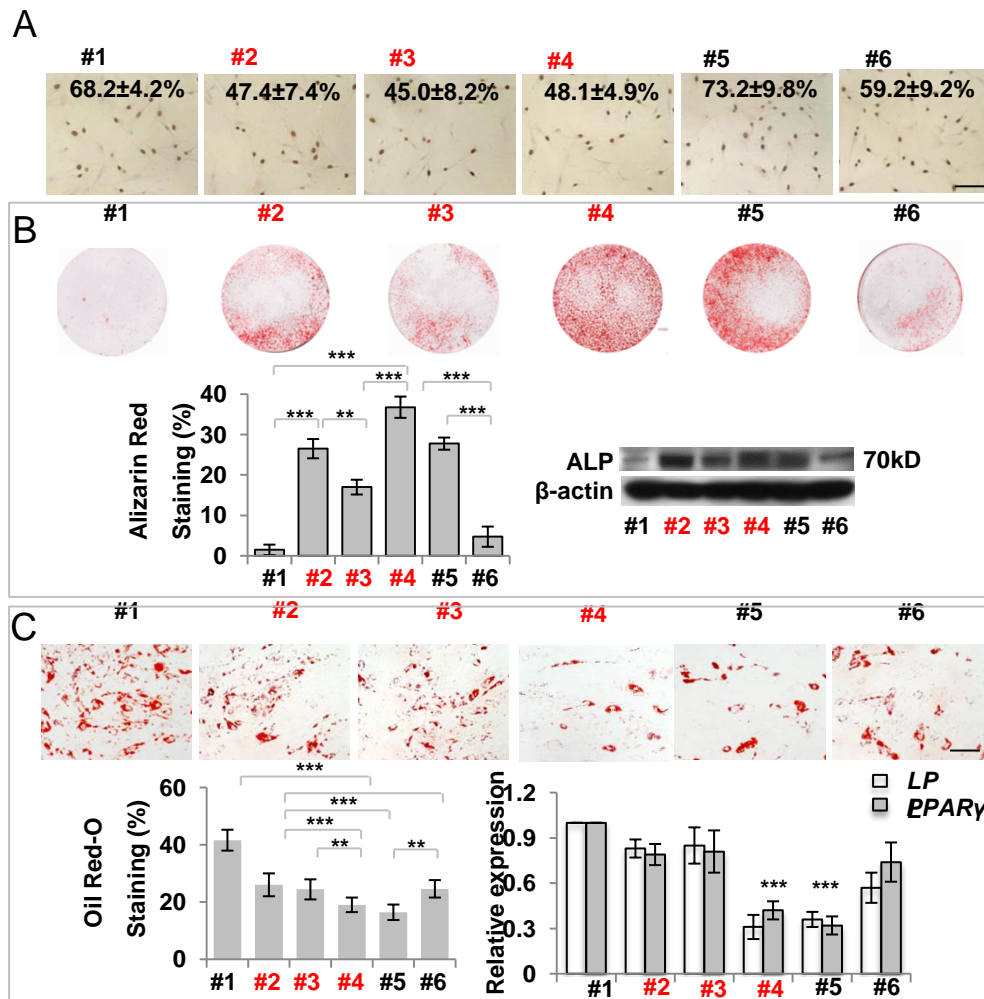

**Figure S6.** Single colony-derived hMSCs possess stem cell properties. **(A)** Proliferation and differentiation assays were performed in 6 representative expanded single colony-derived hMSCs. Six single colony hMSCs showed various proliferation rates, as assessed by BrdU labeling assay. **(B)** Six single colony hMSCs showed variable *in vitro* mineral nodule formation capacity by Alizarin Red Staining and expressed the osteogenic marker ALP by Western blot analysis. **(C)** Six single colony hMSCs showed variable *in vitro* adipogenic differentiation by Oil Red O Staining and expressed the adipogenic lineage-specific genes *PPAR $\gamma$*  and *LPL* by qPCR. \*, compared to #1,  $P < 0.05$ , \*\*,  $P < 0.01$ , and \*\*\*,  $P < 0.001$  (mean $\pm$ SD). Scale bars; 100  $\mu$ m. The data are representative of three independent experiments.
