# Supplementary material
Source: PubMed Central journal article supplement (PMC3541659)
Supplement: cr2012179x7.pdf [file cr2012179x7.pdf]

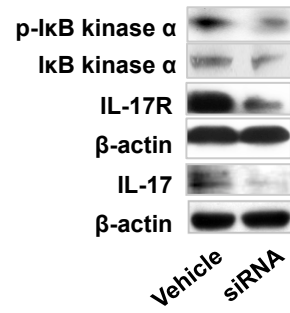

**Figure S7.** Western blot analysis showed efficacy of IL-17, IL-17R, and IκB kinase  $\alpha$  siRNA in hMSCs. The data are representative of three independent experiments.
