# Supplementary material
Source: PubMed Central journal article supplement (PMC3541659)
Supplement: cr2012179x8.pdf [file cr2012179x8.pdf]

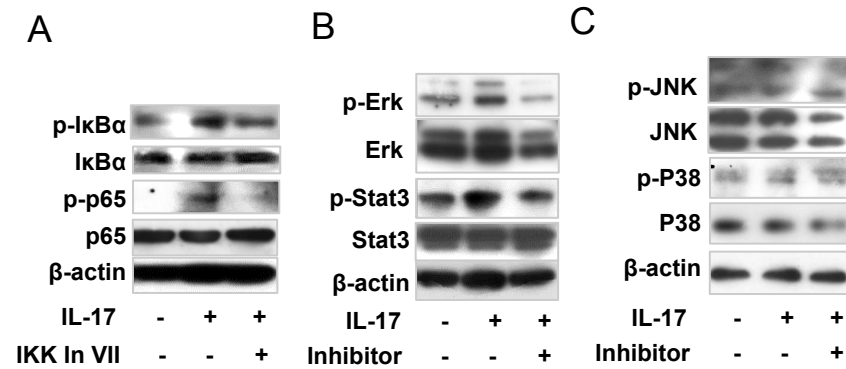

**Figure S8.** (A) Western blot analysis showed that recombinant IL-17 treatment increased p-IκBα and p-p65 in MSCs. IKK inhibitor VII blocked IL-17-elevated p-IκBα and p-p65. (B) Western blot analysis showed that recombinant IL-17 treatment increased p-Stat3 and p-Erk in MSCs. Their inhibitors could block IL-17-induced upregulation of p-Stat3 (5, 15-DP) and p-Erk (PD325901). (C) Western blot analysis showed that IL-17 (20ng/ml) treatment failed to activate P38 (inhibitor: SB203580) and JNK (inhibitor: SP600125) signaling in MSCs. The data are representative of three independent experiments.
