# Supplementary material
Source: PubMed Central journal article supplement (PMC3541659)
Supplement: cr2012179x10.pdf [file cr2012179x10.pdf]

**Supplementary information, Table PCR primers**

| <b>Gene</b>         | <b>Forward sequence (5' to 3')</b> | <b>Reverse sequence (5' to 3')</b> | <b>Species</b> |
|---------------------|------------------------------------|------------------------------------|----------------|
| IL-17A              | ACCTCACACG AGGCACAAGTGC            | CATTGCGGTGGAGAGTCCAGGG             | mouse          |
| LPL                 | ATGGAGAGCAAAGCCCTGCTC              | GTTAGGTCCAGCTGGATCGAG              | human          |
| PPAR $\gamma$       | CTCCTATTGACCCAGAAAGC               | GTAGAGCTGAGTCTTCTCAG               | human          |
| GAPDH               | CACCATGGAGAAGGCCGGGGG              | GACGGACACATTGGGGGTAG               | mouse          |
| GAPDH               | AGCCGCATCTTCTTTTTCGTC              | TCATATTTGGCAGGTTTTTCT              | human          |
| NFkB binding site 1 | CCCTCCCCAGCAAGCTCCA                | CCCCGGTTGCCGCTTTCTCC               | human          |
| NFkB binding site 2 | CCCACGACCCCGCATGTTTCT              | GACACCCCGGGCAAAGGGA                | human          |
| NFkB binding site 3 | GTCGGCAGGGGTTTTGAAGCCG             | CCCGCCACGCGAGATGAG                 | human          |
